**Conclusions:** BiOSS LIM C is a feasible device with promising safety profile and mid-term clinical effectiveness.

### P5527

#### Unique stent design with continuous cobalt wire can avoid protruding immediately after percutaneous coronary intervention compared to classical tubed stent

D. Nakamura, M. Nishino, K. Ukita, K. Yanagawa, M. Yasunaga, H. Nakamura, Y. Matsuhiro, K. Yasumura, K. Yasumoto, A. Tanaka, N. Mori, M. Yano, Y. Egami, R. Shutta, J. Tanouchi. *Osaka Rosai Hospital, Division of Cardiology, Sakai, Japan*

**Background:** Plaque protrusion estimated by optical coherence tomography (OCT) immediately after stent implantation, especially for irregular protrusion, has been reported as an independent predictor of 1-year target lesion revascularization. The Resolute zotarolimus-eluting stent (R-ZES) has a unique design with the continuous wire that is molded into a sinusoidal wave and wrapped in a helical pattern and laser-fused at certain points, which is called as the continuous sinusoid technology (CST). This allows significantly more struts to be aligned in the axial direction and the gap of each strut to be narrow than other classical tubed stent design, which result in the strong radial force, less vessel straightening and less plaque protruding.

**Purpose:** The aim of this study is to evaluate the difference of the protrusion estimated by OCT between R-ZES and other kinds of tubed stents.

**Methods:** Between February 2017 and January 2018, 136 consecutive lesions of 134 patients who had postprocedure OCT imaging were enrolled. We examined the difference of the abnormal OCT finding, especially the frequency and amount of intra-stent protrusion such as smooth, disrupted and irregular protruding between R-ZES with CST and other tubed stents.

**Results:** Thirty lesions had R-ZES and 106 lesions had classical tubed stents (38 lesions had a durable polymer everolimus-eluting stent, 31 lesions had a biodegradable polymer biolimus-eluting stent and 37 lesions had a biodegradable polymer everolimus-eluting stent). There is no significant difference in the baseline characteristics including the frequency of acute coronary syndrome (ACS) and the main plaque component estimated by OCT. Maximum distance of irregular protruding was lower in R-ZES compared to tubed stents ( $128 \pm 45$  vs  $206 \pm 25$ ,  $p=0.064$ ). Focusing on the ACS lesions, R-ZES showed significantly less frequency (22.2% vs 72.7%,  $p=0.008$ ) and lower distance of irregular protrusion ( $80 \pm 65$  vs  $403 \pm 126 \mu\text{m}$ ,  $p=0.018$ ) compared to the other tubed stents (Figure). Other abnormal findings such as edge dissection, malapposition and under-expansion were similar between the two groups.

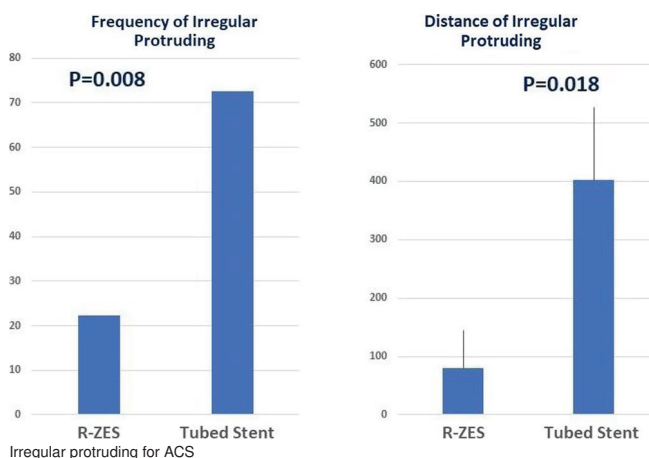

**Conclusions:** R-ZES with unique design with the continuous wire that is molded into a sinusoidal wave and wrapped in a helical pattern can avoid the intra-stent irregular protrusion, especially for ACS lesions.

### P5528

#### Clinical impact of implanted stent length on clinical outcomes in patients treated with second-generation DES: a pooled analysis from RESET and NEXT trial

W.H. Watanabe<sup>1</sup>, M.T. Morimoto<sup>2</sup>, S.H. Shiomi<sup>3</sup>, N.M. Natsuaki<sup>4</sup>, K.K. Kawai<sup>5</sup>, K.K. Kozuma<sup>6</sup>, K.K. Kadota<sup>7</sup>, I.K. Igarashi<sup>8</sup>, T.K. Tanabe<sup>9</sup>, M.Y. Morino<sup>10</sup>,

H.K. Hibi<sup>11</sup>, A.T. Akasaka<sup>12</sup>, A.M. Abe<sup>13</sup>, S.S. Suwa<sup>14</sup>, K.T. Kimura<sup>3</sup>. <sup>1</sup>Japan Red Cross Society Wakayama Medical Center, Division of Cardiology, Wakayama, Japan; <sup>2</sup>Hyogo College of Medicine, Department of Clinical Statistics, Hyogo, Japan; <sup>3</sup>Kyoto University, Department of Cardiology, Kyoto, Japan; <sup>4</sup>Saga University Hospital, Department of Cardiology, Saga, Japan; <sup>5</sup>Chikamori Hospital, Kochi, Japan; <sup>6</sup>Teikyo University Hospital, Tokyo, Japan; <sup>7</sup>Kurashiki Central Hospital, Kurashiki, Japan; <sup>8</sup>Hokkaido Social Insurance Hospital, Hokkaido, Japan; <sup>9</sup>Mitsui Memorial Hospital, Tokyo, Japan; <sup>10</sup>Iwate University Hospital, Iwate, Japan; <sup>11</sup>Yokohama City University Medical Center, Yokohama, Japan; <sup>12</sup>Wakayama Medical University, Wakayama, Japan; <sup>13</sup>Kyoto Medical Center, Kyoto, Japan; <sup>14</sup>Juntendo University Shizuoka Hospital, Izunokuni, Japan

**Background:** Little clinical data concerning the association between the implanted stent length and clinical outcomes in patients with 2nd-G drug-eluting stents.

**Methods:** REST and NEXT are prospective, multicenter, randomized "DES versus DES" trials; 3196 patients and 3235 patients were enrolled in each trial. Using the pooled individual patient-level data, the current study population consisted of 3678 patients who received single lesion treatment using new generation DES such as everolimus-eluting stent and biolimus-eluting stent. They were divided into 3 groups according to the implanted stent length by off-line quantitative coronary angiography assessed in a core angiographic laboratory [long-stenting (LS) group:  $\geq 40\text{mm}$ , intermediate length (IL) group:  $20\text{--}40\text{mm}$ , short-stenting (SS) group:  $\leq 20\text{mm}$ ].

**Results:** The cumulative 3-year incidence of target lesion revascularization was significantly higher in the LS group than in the IL and the SS groups (9.5% versus 5.7% versus 5.8%, log-rank  $P=0.004$ ). Even after adjusting for the clinical, angiographic, and procedural characteristics, the excess risk of the LS group relative to the SS group for target lesion revascularization remained significant (hazard ratio [HR]: 1.58, 95% confidence interval [CI]: 1.09–2.29,  $P=0.02$ ).

**Conclusions:** The implanted stent length longer than 40mm in the core laboratory analysis was associated with increased target lesion revascularization in patients treated with the second-generation drug-eluting stent.

**Funding Acknowledgements:** Abbott and Terumo

### P5529

#### A five-year follow-up of randomised studies comparing outcomes between bioabsorbable-polymer and durable-polymer drug-eluting stents: systematic review and meta-analysis

K. Singh, D. Subhaharan, N. Mridha. *Gold Coast Hospital, Gold Coast, Australia*

**Background:** Progress in the platforms for DES is aimed at improving safety and outcomes. Second-generation DESs have a biocompatible durable polymer (DP), in addition to bioabsorbable polymers (BP). The benefit of BP is to remove the polymer-triggered inflammatory stimulation associated with DP. There is evidence to suggest BP-DESs are non-inferior to the current generation DES at 12 months. The time course for polymer absorption varies between stents and may take from 4 to 15 months. Hence the potential benefits of BP-DES over DP-DES can only be tested over a longer period, to overcome the time taken for polymer absorption.

**Purpose:** The purpose of the meta-analysis was to compare the safety and efficacy outcomes of BP-DES over a long-term follow-up.

**Methods:** A thorough computer-based search using Ovid MEDLINE, EMBASE, Google Scholar, and PubMed databases was conducted up to 11 November 2017. We only included randomised studies (RCT) comparing clinical outcomes between the BP-DESs and DP-DESs. Only studies where data were available for a minimum of 5 years were included. Safety (Stent thrombosis (ST) and reinfarction) and efficacy (target lesion revascularization (TLR), cardiac mortality) were analysed.

**Results:** The literature search yielded 445 citations. After going through the abstracts and full-texts of the articles we included 5 RCTs where 5-year follow-up data was available. The information about the included studies, stent platform, drug and type of polymer is provided in Table 1. There was no difference in the ST (OR 0.71, 95% CI 0.47–1.09,  $I^2 = 31\%$ ,  $P=0.12$ ), reinfarction (OR 1.01, 95% CI 0.85–1.21,  $I^2 = 0\%$ ,  $P=0.89$ ), cardiac mortality (OR 1.00, 95% CI 0.81–1.23,  $I^2 = 0\%$ ,  $P=0.98$ ), all cause mortality (OR 0.95, 95% CI 0.80–1.14,  $I^2 = 21\%$ ,  $P=0.61$ ) and TLR (OR 0.80, 95% CI 0.58–1.11,  $I^2 = 68\%$ ,  $P=0.18$ ). Furthermore, there was no difference in the very late ST (OR 0.49, 95% CI 0.19–1.30,  $I^2 = 56\%$ ,  $P=0.15$ ).

**Conclusion(s):** There is no difference in the safety and efficacy outcomes between the BP-DES and DP-DES at a follow up of 5-years. The lack of superiority of thick struts first generation BP-DES may not be applicable to the newer generation ultrathin BP-DES.

Abstract P5529 – Table 1. Stent characteristics

| Author             | Year | BP-DES name     | Stent platform  | Drug        | Polymer       | DP-DES name         | Stent Platform  | Drug                 | Polymer        |
|--------------------|------|-----------------|-----------------|-------------|---------------|---------------------|-----------------|----------------------|----------------|
| Meridith et al.    | 2017 | SYNERGY         | PT-CR           | Everolimus  | PLGA          | PROMUS ELEMENT      | PI-Cr           | Everolimus           | PVDF           |
| Vlachojannis et al | 2017 | NOBORI          | Stainless Steel | Biolimus A9 | PLA           | XIENCE PRIME/PROMUS | Co/PI-Cr        | Everolimus           | PVDF           |
| Chevalier et al    | 2015 | NOBORI          | Stainless Steel | Biolimus A9 | PLA           | TAXUS/ LIBERTE      | Stainless Steel | Paclitaxel           | SIBS           |
| Serruys et al.     | 2013 | BIOMATRIX FLEX  | Stainless Steel | Biolimus A9 | PLA           | CYPHER SELECT       | Stainless steel | Sirolimus            | PEVA/PBMA      |
| Kufner et al.      | 2014 | YUKON CHOICE PC | Stainless Steel | Sirolimus   | Resomer R202S | XIENCE/CYPHER       | Co/PI-Cr        | Everolimus/Sirolimus | PEVA/PBMA/PVDF |
